# Supplementary material for: Health care utilizations and costs of Campylobacter enteritis in Germany: A claims data analysis
Source: PubMed Central journal article supplement (PMC10075411; doi:10.1371/journal.pone.0283865), 2023-04-05
Supplement: pone.0283865.s001.pdf [file pone.0283865.s001.pdf]

## Supplementary figures and tables for

### Health care utilizations and costs of *Campylobacter* enteritis in Germany: a claims data analysis

Elisabeth Schorling, Sonja Lick, Pablo Steinberg and Dagmar A. Brüggemann

Fig A. Comparison of age- and gender-specific *Campylobacter* enteritis rates in Germany in 2017.

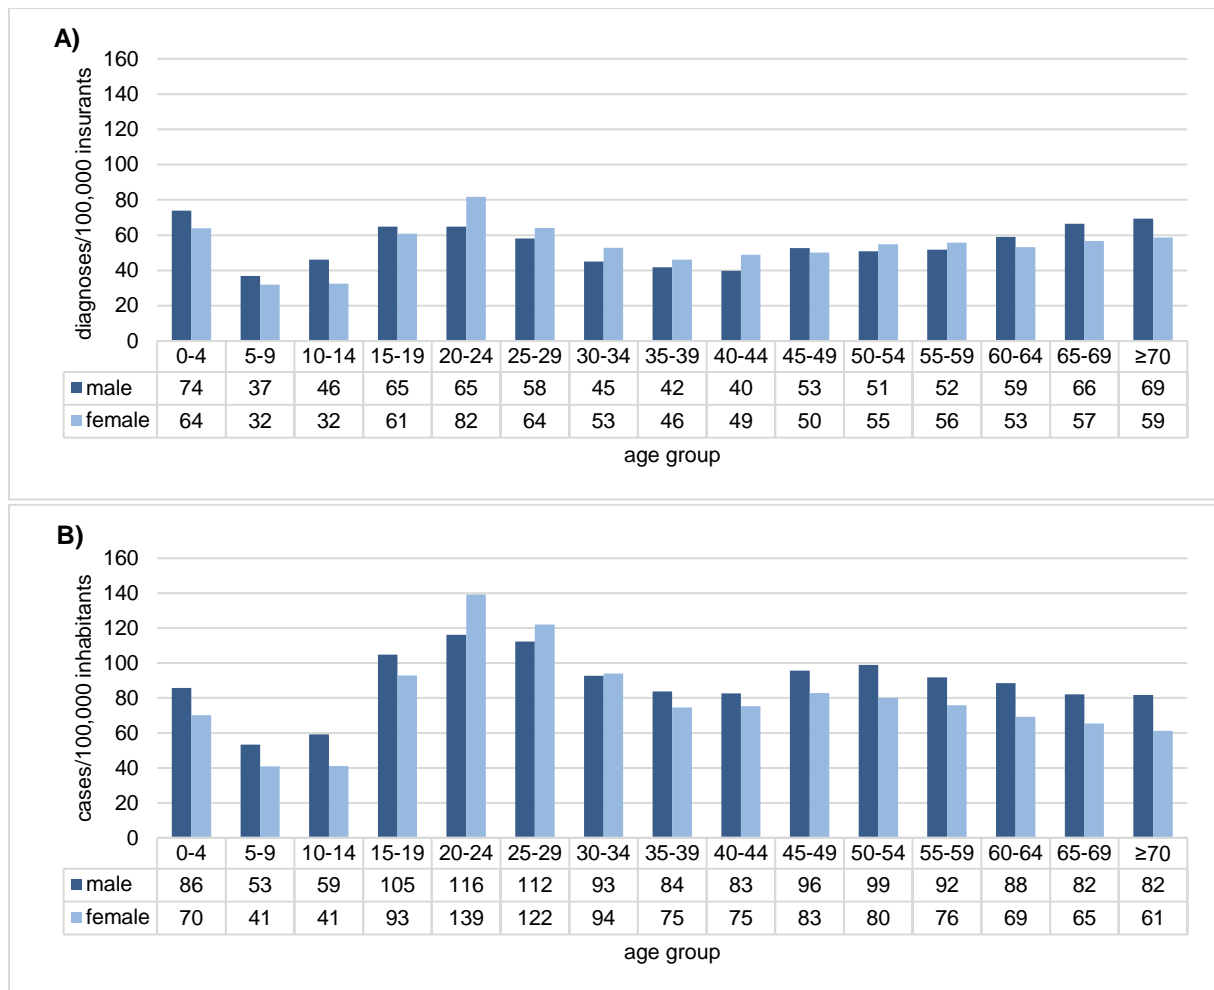

A) *Campylobacter* enteritis diagnoses of AOK insurants in 2017 per 100,000 insurants (number of AOK insurants according to [1] and personal communication from WiDO on the proportion of insurants <15 years). B) Officially reported *Campylobacter* enteritis cases per 100,000 inhabitants in Germany in 2017 according to national surveillance data [2].

**Table A. Existing comorbidities in patients and controls during the first year of the individual study period according to the Elixhauser comorbidity index.**

| Comorbidities [%]                                | Study population      |                                     |         | Subgroup              |                                    |         |
|--------------------------------------------------|-----------------------|-------------------------------------|---------|-----------------------|------------------------------------|---------|
|                                                  | Patients<br>(n=9,945) | Controls <sup>a</sup><br>(n=29,835) | p value | Patients<br>(n=4,036) | Controls <sup>b</sup><br>(n=9,350) | p value |
| Congestive heart failure                         | 11.42                 | 6.65                                | <0.001  | 0.79                  | 0.28                               | <0.001  |
| Cardiac arrhythmias                              | 15.96                 | 9.67                                | <0.001  | 3.17                  | 1.78                               | <0.001  |
| Valvular disease                                 | 8.50                  | 5.16                                | <0.001  | 1.41                  | 0.74                               | <0.001  |
| Pulmonary circulation disorders                  | 2.72                  | 1.45                                | <0.001  | 0.35                  | 0.15                               | 0.022   |
| Peripheral vascular disorders                    | 11.96                 | 7.36                                | <0.001  | 1.14                  | 0.41                               | <0.001  |
| Hypertension                                     | 42.09                 | 33.26                               | <0.001  | 8.87                  | 4.62                               | <0.001  |
| Paralysis                                        | 2.18                  | 1.70                                | 0.002   | 0.32                  | 0.35                               | 0.780   |
| Other neurological disorders                     | 5.60                  | 3.50                                | <0.001  | 1.78                  | 1.21                               | 0.009   |
| Chronic pulmonary disease                        | 25.42                 | 16.55                               | <0.001  | 12.31                 | 8.59                               | <0.001  |
| Diabetes, uncomplicated                          | 18.05                 | 12.57                               | <0.001  | 1.64                  | 1.20                               | 0.043   |
| Diabetes, complicated                            | 10.91                 | 6.63                                | <0.001  | 0.40                  | 0.17                               | 0.014   |
| Hypothyroidism                                   | 15.97                 | 9.74                                | <0.001  | 4.73                  | 2.98                               | <0.001  |
| Renal failure                                    | 13.24                 | 6.49                                | <0.001  | 1.16                  | 0.52                               | <0.001  |
| Liver disease                                    | 14.63                 | 7.81                                | <0.001  | 3.94                  | 1.65                               | <0.001  |
| Peptic ulcer disease excluding bleeding          | 2.82                  | 1.09                                | <0.001  | 0.47                  | 0.18                               | 0.003   |
| AIDS/HIV                                         | 0.22                  | 0.07                                | <0.001  | 0.02                  | 0.00                               | 0.128   |
| Lymphoma                                         | 0.94                  | 0.42                                | <0.001  | 0.17                  | 0.05                               | 0.033   |
| Metastatic cancer                                | 1.85                  | 1.08                                | <0.001  | 0.32                  | 0.12                               | 0.010   |
| Solid tumor without metastasis                   | 9.55                  | 6.41                                | <0.001  | 2.11                  | 1.08                               | <0.001  |
| Rheumatoid arthritis /collagen vascular diseases | 7.04                  | 3.93                                | <0.001  | 1.49                  | 0.82                               | <0.001  |
| Coagulopathy                                     | 4.34                  | 2.06                                | <0.001  | 1.04                  | 0.64                               | 0.015   |
| Obesity                                          | 20.67                 | 13.10                               | <0.001  | 6.62                  | 4.52                               | <0.001  |
| Weight loss                                      | 3.95                  | 1.29                                | <0.001  | 1.73                  | 0.77                               | <0.001  |
| Fluid and electrolyte disorders                  | 33.85                 | 3.50                                | <0.001  | 20.49                 | 1.38                               | <0.001  |
| Blood loss anemia                                | 0.90                  | 0.30                                | <0.001  | 0.35                  | 0.07                               | <0.001  |
| Deficiency anemia                                | 7.63                  | 3.90                                | <0.001  | 3.39                  | 2.05                               | <0.001  |
| Alcohol abuse                                    | 3.20                  | 2.09                                | <0.001  | 0.94                  | 0.76                               | 0.282   |
| Drug abuse                                       | 1.57                  | 0.87                                | <0.001  | 0.79                  | 0.47                               | 0.023   |
| Psychoses                                        | 1.61                  | 1.06                                | <0.001  | 0.20                  | 0.16                               | 0.628   |
| Depression                                       | 24.53                 | 15.38                               | <0.001  | 9.42                  | 6.11                               | <0.001  |

Comorbidities were assessed by applying the Elixhauser comorbidity index [3,4]. The Chi-square test was used to analyze statistically significant associations with the group assignment.

<sup>a</sup> Three controls per patient, matched by age, gender and state of residence.

<sup>b</sup> One to three controls per patient, matched by age, gender, state of residence and existing comorbidities (in terms of either the Elixhauser comorbidity index [3,4] or the pharmacy-based metric with the ATC algorithm [5], without *pain*).

**Table B. Existing chronic conditions in patients and controls during the first year of the individual study period according to the pharmacy-based metric.**

| Chronic disease or medication [%]       | Study population      |                                     |         | Subgroup              |                                    |         |
|-----------------------------------------|-----------------------|-------------------------------------|---------|-----------------------|------------------------------------|---------|
|                                         | Patients<br>(n=9,945) | Controls <sup>a</sup><br>(n=29,835) | p value | Patients<br>(n=4,036) | Controls <sup>b</sup><br>(n=9,350) | p value |
| Antiplatelet                            | 2.46                  | 1.29                                | <0.001  | 0.05                  | 0.03                               | 0.631   |
| Anticoagulant                           | 6.40                  | 3.83                                | <0.001  | 0.84                  | 0.75                               | 0.571   |
| Epilepsy                                | 5.00                  | 2.82                                | <0.001  | 0.12                  | 0.14                               | 0.826   |
| Hypertension                            | 8.17                  | 4.85                                | <0.001  | 0.30                  | 0.19                               | 0.239   |
| HIV                                     | 0.24                  | 0.07                                | <0.001  | 0.02                  | 0.00                               | 0.128   |
| Tuberculosis                            | 0.10                  | 0.02                                | 0.001   | 0.00                  | 0.00                               | .       |
| Rheumatic conditions                    | 11.86                 | 5.79                                | <0.001  | 3.82                  | 2.48                               | <0.001  |
| Hyperlipidemia                          | 17.05                 | 12.26                               | <0.001  | 1.29                  | 0.51                               | <0.001  |
| Malignancies                            | 0.58                  | 0.25                                | <0.001  | 0.00                  | 0.00                               | .       |
| Parkinson's disease                     | 1.90                  | 0.93                                | <0.001  | 0.12                  | 0.05                               | 0.171   |
| Renal disease                           | 0.65                  | 0.20                                | <0.001  | 0.00                  | 0.01                               | 0.511   |
| End stage renal disease                 | 0.42                  | 0.16                                | <0.001  | 0.00                  | 0.00                               | .       |
| Anti-arrhythmic                         | 1.83                  | 1.04                                | <0.001  | 0.00                  | 0.00                               | .       |
| Ischemic heart disease / Angina         | 2.13                  | 1.13                                | <0.001  | 0.05                  | 0.01                               | 0.168   |
| Congestive heart failure / Hypertension | 32.58                 | 25.21                               | <0.001  | 3.57                  | 1.89                               | <0.001  |
| Diabetes                                | 11.59                 | 7.53                                | <0.001  | 0.25                  | 0.09                               | 0.019   |
| Glaucoma                                | 2.07                  | 1.69                                | 0.014   | 0.12                  | 0.12                               | 0.924   |
| Liver failure                           | 0.50                  | 0.23                                | <0.001  | 0.25                  | 0.20                               | 0.611   |
| Acid peptic disease                     | 39.37                 | 17.57                               | <0.001  | 11.52                 | 4.84                               | <0.001  |
| Transplantation                         | 0.98                  | 0.23                                | <0.001  | 0.05                  | 0.01                               | 0.168   |
| Respiratory illness, asthma             | 16.05                 | 9.28                                | <0.001  | 7.78                  | 5.53                               | <0.001  |
| Thyroid disorders                       | 15.20                 | 10.70                               | <0.001  | 3.42                  | 2.02                               | <0.001  |
| Gout                                    | 6.49                  | 3.87                                | <0.001  | 0.42                  | 0.22                               | 0.050   |
| Inflammatory bowel disease, chronic     | 2.44                  | 0.08                                | <0.001  | 1.02                  | 0.01                               | <0.001  |
| Pain and inflammation                   | 37.96                 | 30.43                               | <0.001  | 32.33                 | 27.52                              | <0.001  |
| Pain                                    | 4.83                  | 2.32                                | <0.001  | 0.72                  | 0.28                               | <0.001  |
| Depression                              | 11.71                 | 6.93                                | <0.001  | 1.51                  | 0.91                               | 0.002   |
| Psychotic illness                       | 3.45                  | 2.33                                | <0.001  | 0.30                  | 0.17                               | 0.143   |
| Bipolar disorders                       | 0.21                  | 0.09                                | 0.002   | 0.02                  | 0.02                               | 0.904   |
| Anxiety and tension                     | 3.19                  | 1.64                                | <0.001  | 0.27                  | 0.21                               | 0.517   |
| Hepatitis                               | 0.09                  | 0.02                                | <0.001  | 0.00                  | 0.00                               | .       |
| Ischemic heart disease / Hypertension   | 27.82                 | 20.86                               | <0.001  | 2.80                  | 1.26                               | <0.001  |

Chronic conditions were assessed by applying the pharmacy-based metric with the ATC algorithm [5]. The Chi-square test was used to analyze statistically significant associations with the group assignment.

<sup>a</sup> Three controls per patient, matched by age, gender and state of residence.

<sup>b</sup> One to three controls per patient, matched by age, gender, state of residence and existing comorbidities (in terms of either the Elixhauser comorbidity index [3,4] or the pharmacy-based metric with the ATC algorithm [5], without *pain*).

**Table C. Association between the use of proton pump inhibitors and newly diagnosed *Campylobacter* enteritis.**

| <b>Parameter</b>                                                     | <b>aOR</b> | <b>95 % confidence interval</b> |      | <b>p</b> |
|----------------------------------------------------------------------|------------|---------------------------------|------|----------|
| <b>Use of proton pump inhibitors<sup>a</sup></b> (reference: no use) | 3.15       | 2.87                            | 3.46 | <0.001   |
| <b>Male</b> (reference: female)                                      | 1.10       | 1.05                            | 1.15 | <0.001   |
| <b>Age group</b> (reference: 45 to 64 years)                         |            |                                 |      |          |
| <5 years                                                             | 2.57       | 2.31                            | 2.87 | <0.001   |
| 5 to 14 years                                                        | 2.43       | 2.18                            | 2.71 | <0.001   |
| 15 to 29 years                                                       | 2.04       | 1.89                            | 2.20 | <0.001   |
| 30 to 44 years                                                       | 1.61       | 1.49                            | 1.74 | <0.001   |
| ≥65 years                                                            | 0.63       | 0.59                            | 0.68 | <0.001   |
| <b>Comorbidities<sup>b</sup></b> (reference: no comorbidities)       |            |                                 |      |          |
| one or two comorbidities                                             | 2.71       | 2.54                            | 2.90 | <0.001   |
| three or more comorbidities                                          | 6.38       | 5.90                            | 6.89 | <0.001   |

Results of a multivariable logistic regression analysis with *Campylobacter* enteritis diagnosis (yes/no) as dependent variable, n=9,944 patients and n=29,832 controls included in the model. aOR: adjusted odds ratio.

<sup>a</sup> Prescriptions of proton pump inhibitors within four weeks prior to the individual study period according to the pharmacy dispensing date.

<sup>b</sup> Comorbidities were assessed by the Elixhauser comorbidity index [3,4].

**Table D. Age- and gender-specific health care utilizations and work incapacities associated with diagnoses of *Campylobacter* enteritis over a 12-month period.**

|                                               | Male             |                  |                  |                    |                   |                    | Female          |                 |                   |                    |                    |                  | Test for differences<br>[p value] |        |
|-----------------------------------------------|------------------|------------------|------------------|--------------------|-------------------|--------------------|-----------------|-----------------|-------------------|--------------------|--------------------|------------------|-----------------------------------|--------|
|                                               | <5 y             | 5-14 y           | 15-29 y          | 30-44 y            | 45-64 y           | ≥65 y              | <5 y            | 5-14 y          | 15-29 y           | 30-44 y            | 45-64 y            | ≥65 y            | Age group                         | Gender |
| <b>Moderate CE [n, %]</b>                     | 234 (3.7)        | 225 (3.6)        | 583 (9.2)        | 485 (7.7)          | 982 (15.5)        | 563 (8.9)          | 192 (3.0)       | 175 (2.8)       | 648 (10.2)        | 567 (8.9)          | 957 (15.1)         | 724 (11.4)       |                                   |        |
| <b>Outpatient medical care [%]</b>            |                  |                  |                  |                    |                   |                    |                 |                 |                   |                    |                    |                  |                                   |        |
| GP                                            | 6.0              | 23.6             | 63.6             | 62.5               | 59.7              | 43.9               | 7.8             | 20.0            | 59.9              | 62.6               | 60.4               | 45.7             | <0.001                            | 0.470  |
| pediatrician                                  | 83.3             | 65.3             | 4.6              | 0.0                | 0.0               | 0.0                | 80.7            | 69.1            | 3.2               | 0.4                | 0.0                | 0.0              | <0.001                            | <0.001 |
| internist                                     | 0.9              | 4.4              | 24.9             | 30.1               | 30.0              | 25.9               | 1.6             | 3.4             | 25.8              | 29.8               | 31.2               | 28.2             | <0.001                            | 0.106  |
| other physicians                              | 3.0              | 0.9              | 2.7              | 5.6                | 4.4               | 3.4                | 0.0             | 0.6             | 3.4               | 4.8                | 5.1                | 4.6              | <0.001                            | 0.493  |
| provided in hospitals                         | 0.0              | 0.4              | 0.7              | 0.0                | 0.1               | 0.2                | 0.0             | 0.0             | 0.3               | 0.2                | 0.0                | 0.0              | 0.042                             | 0.173  |
| <b>Prescribed medication<sup>a</sup> [%]</b>  |                  |                  |                  |                    |                   |                    |                 |                 |                   |                    |                    |                  |                                   |        |
| antibiotics                                   | 1.3              | 1.8              | 15.6             | 17.3               | 14.9              | 12.8               | 1.0             | 1.1             | 13.6              | 13.9               | 16.7               | 13.7             | <0.001                            | 0.857  |
| analgesics/spasmodics                         | 32.1             | 13.3             | 10.3             | 13.4               | 18.1              | 21.5               | 33.3            | 14.3            | 12.7              | 15.2               | 20.5               | 27.9             | <0.001                            | 0.004  |
| oral rehydration solution                     | 14.1             | 9.3              | 0.3              | 0.0                | 0.1               | 0.0                | 17.7            | 7.4             | 0.3               | 0.0                | 0.0                | 0.0              | <0.001                            | 0.272  |
| <b>Incapacities for work [%]</b>              | -                | -                | 18.2             | 20.2               | 19.8              | 0.4                | -               | -               | 17.7              | 18.9               | 18.5               | 0.0              | <0.001                            | 0.107  |
| days [md (IQR, min-max)]                      |                  |                  | 5 (3-9,<br>1-55) | 7 (4-12,<br>1-247) | 7 (4-13,<br>1-92) | 12 (1-22,<br>1-22) |                 |                 | 5 (2-10,<br>1-58) | 9 (5-15,<br>1-164) | 11 (5-17,<br>1-78) | -                | <0.001 <sup>b</sup>               | 0.004  |
| <b>Severe CE [n, %]</b>                       | 126 (3.5)        | 155 (4.3)        | 366 (10.1)       | 228 (6.3)          | 446 (12.4)        | 515 (14.3)         | 94 (2.6)        | 89 (2.5)        | 384 (10.6)        | 209 (5.8)          | 378 (10.5)         | 619 (17.2)       |                                   |        |
| <b>Outpatient medical care [%]</b>            |                  |                  |                  |                    |                   |                    |                 |                 |                   |                    |                    |                  |                                   |        |
| GP                                            | 0.8              | 3.2              | 13.1             | 20.6               | 15.9              | 10.1               | 1.1             | 3.4             | 15.4              | 17.7               | 13.0               | 9.4              | <0.001                            | 0.627  |
| pediatrician                                  | 4.8              | 7.7              | 0.3              | 0.0                | 0.0               | 0.0                | 7.4             | 12.4            | 1.6               | 0.0                | 0.0                | 0.0              | <0.001                            | 0.378  |
| internist                                     | 0.0              | 0.0              | 4.1              | 5.7                | 5.4               | 5.0                | 0.0             | 0.0             | 4.9               | 6.2                | 8.7                | 4.5              | <0.001                            | 0.159  |
| other physicians                              | 0.0              | 0.0              | 1.6              | 1.3                | 0.2               | 0.4                | 1.1             | 1.1             | 0.3               | 0.5                | 0.5                | 0.3              | 0.480                             | 0.413  |
| provided in hospitals                         | 0.8              | 0.0              | 0.0              | 0.4                | 0.0               | 0.0                | 2.1             | 0.0             | 0.8               | 0.0                | 0.3                | 0.3              | 0.040                             | 0.051  |
| <b>Inpatient medical care<sup>c</sup> [%]</b> | 100              | 100              | 100              | 100                | 100               | 100                | 100             | 100             | 100               | 100                | 100                | 100              | .                                 | .      |
| stays [md (min-max)]                          | 1 (1-2)          | 1 (1-1)          | 1 (1-2)          | 1 (1-2)            | 1 (1-2)           | 1 (1-2)            | 1 (1-1)         | 1 (1-1)         | 1 (1-2)           | 1 (1-2)            | 1 (1-2)            | 1 (1-2)          | 0.664                             | 0.730  |
| days per stay [md (IQR, min-max)]             | 4 (3-5,<br>1-12) | 4 (3-4,<br>2-14) | 4 (3-5,<br>1-37) | 5 (4-6,<br>1-17)   | 5 (4-7,<br>2-53)  | 6 (5-8,<br>2-37)   | 4 (3-4,<br>2-9) | 4 (3-5,<br>2-9) | 4 (3-5,<br>1-23)  | 4 (3-6,<br>1-22)   | 5 (4-7,<br>2-46)   | 7 (5-9,<br>1-35) | <0.001 <sup>d</sup>               | <0.001 |
| <b>Prescribed medication [%]</b>              |                  |                  |                  |                    |                   |                    |                 |                 |                   |                    |                    |                  |                                   |        |
| antibiotics                                   | 2.4              | 2.6              | 9.3              | 14.0               | 8.5               | 6.4                | 0.0             | 1.1             | 13.0              | 11.0               | 11.6               | 8.2              | <0.001                            | 0.072  |
| analgesics/spasmodics                         | 44.4             | 11.6             | 12.0             | 19.7               | 25.8              | 24.7               | 35.1            | 16.9            | 16.9              | 21.5               | 28.8               | 32.8             | <0.001                            | 0.002  |
| oral rehydration solution                     | 18.3             | 1.9              | 0.0              | 0.0                | 0.0               | 0.0                | 18.1            | 3.4             | 0.0               | 0.0                | 0.0                | 0.0              | <0.001                            | 0.441  |
| <b>Incapacities for work [%]</b>              | -                | -                | 53.0             | 75.0               | 57.2              | 0.4                | -               | -               | 52.6              | 66.5               | 51.9               | 0.2              | <0.001                            | <0.001 |
| days [md (IQR, min-max)]                      |                  |                  | 2 (1-6,<br>1-28) | 3 (1-8,<br>1-40)   | 4 (1-8,<br>1-64)  | 3 (1-5,<br>1-5)    |                 |                 | 2 (1-6,<br>1-21)  | 3 (1-7,<br>1-71)   | 4 (1-12,<br>1-207) | 13               | <0.001 <sup>e</sup>               | 0.712  |

The percentage of patients utilizing the respective services or of patients who were incapacitated for work (%) and median (IQR, min-max) number of days or stays of utilizing patients are given. Existing differences or associations depending on age group and gender were examined using the Wilcoxon rank-sum, Kruskal-Wallis (followed by pairwise post-hoc Dunn's test) or Chi-square test, respectively. CE: *Campylobacter* enteritis, IQR: interquartile range, md: median, y: years.

<sup>a</sup> Considered to be CE-associated according to national medical treatment guidelines, as prescriptions of medication are not directly diagnosis-linked in the claims data.

<sup>b</sup> Pairwise comparisons using Dunn's test indicated statistically significant differences between 15-29 y and 30-44 y as well as 15-29 y and 45-64 y.

<sup>c</sup> Only hospitalizations with principal diagnoses were considered to be disease-associated and are displayed.

<sup>d</sup> Pairwise comparisons using Dunn's test indicated statistically significant differences between all groups except for <5 y and 5-14 y as well as 15-29 y and 30-44 y.

<sup>e</sup> Pairwise comparisons using Dunn's test indicated statistically significant differences between 15-29 y and 45-64 y as well as 30-44 y and 45-64 y.

**Table E. Estimation of *Campylobacter* enteritis-related costs of outpatient medical care in the first year of the study period.**

|                                            | Part 1: Probability of non-zero costs<br>(n=13,386) |                |        | Part 2: Non-zero cost estimation<br>(n=11,639) |                |        |
|--------------------------------------------|-----------------------------------------------------|----------------|--------|------------------------------------------------|----------------|--------|
|                                            | Coefficient                                         | 95 % CI        | p      | Coefficient                                    | 95 % CI        | p      |
| <b>Male</b> (reference: female)            | -0.88                                               | -1.00 to -0.77 | <0.001 | -0.30                                          | -0.34 to -0.27 | <0.001 |
| <b>Age group</b>                           |                                                     |                |        |                                                |                |        |
| <5 years                                   | 1.84                                                | 1.57 to 2.12   | <0.001 | 0.14                                           | 0.07 to 0.20   | <0.001 |
| 5 to 14 years                              | 0.38                                                | 0.19 to 0.57   | <0.001 | -0.24                                          | -0.30 to -0.17 | <0.001 |
| 15 to 29 years                             | 0.30                                                | 0.15 to 0.46   | <0.001 | -0.24                                          | -0.29 to -0.18 | <0.001 |
| 30 to 44 years                             | 0.09                                                | -0.09 to 0.26  | 0.324  | -0.12                                          | -0.18 to -0.06 | <0.001 |
| 45 to 64 years                             | Reference                                           |                |        | Reference                                      |                |        |
| ≥65 years                                  | 0.28                                                | -0.18 to 0.78  | 0.243  | 0.39                                           | 0.25 to 0.52   | <0.001 |
| <b><i>Campylobacter</i> enteritis (CE)</b> |                                                     |                |        |                                                |                |        |
| no CE                                      | Reference                                           |                |        | Reference                                      |                |        |
| moderate CE                                | 5.81                                                | 4.68 to 7.61   | <0.001 | 0.68                                           | 0.64 to 0.72   | <0.001 |
| severe CE                                  | 2.47                                                | 2.10 to 2.90   | <0.001 | 0.36                                           | 0.31 to 0.42   | <0.001 |
| <b>Constant</b>                            | 1.67                                                | 1.52 to 1.82   | <0.001 | 5.14                                           | 5.09 to 5.19   | <0.001 |
| <b>Goodness-of-fit</b>                     |                                                     |                |        |                                                |                |        |
| McFadden's pseudo R <sup>2</sup>           | 0.16                                                |                |        |                                                |                |        |
| adjusted R <sup>2</sup>                    |                                                     |                |        | 0.13                                           |                |        |

Results of a two-part regression model: i) probability of non-zero costs via logistic regression, ii) cost estimation via ordinary least squares regression of log-transformed non-zero costs; n=4,036 patients and n=9,350 controls, matched by age, gender, state of residence and comorbidities (in terms of either the Elixhauser comorbidity index [3,4] or the pharmacy-based metric with the ATC algorithm [5], without *pain*). CE: *Campylobacter* enteritis, CI: confidence interval.

**Table F. Estimation of *Campylobacter* enteritis-related costs of prescribed medication in the first year of the study period.**

|                                            | Part 1: Probability of non-zero costs<br>(n=13,386) |                |        | Part 2: Non-zero cost estimation<br>(n=9,609) |                |        |
|--------------------------------------------|-----------------------------------------------------|----------------|--------|-----------------------------------------------|----------------|--------|
|                                            | Coefficient                                         | 95 % CI        | p      | Coefficient                                   | 95 % CI        | p      |
| <b>Male</b> (reference: female)            | -0.66                                               | -0.74 to -0.58 | <0.001 | -0.14                                         | -0.19 to -0.09 | <0.001 |
| <b>Age group</b>                           |                                                     |                |        |                                               |                |        |
| <5 years                                   | 2.31                                                | 2.08 to 2.56   | <0.001 | -0.08                                         | -0.16 to 0.01  | 0.074  |
| 5 to 14 years                              | 0.62                                                | 0.47 to 0.78   | <0.001 | -0.38                                         | -0.47 to -0.30 | <0.001 |
| 15 to 29 years                             | -0.16                                               | -0.28 to -0.05 | 0.006  | -0.39                                         | -0.46 to -0.31 | <0.001 |
| 30 to 44 years                             | -0.28                                               | -0.41 to -0.15 | <0.001 | -0.41                                         | -0.49 to -0.32 | <0.001 |
| 45 to 64 years                             | Reference                                           |                |        | Reference                                     |                |        |
| ≥65 years                                  | 0.63                                                | 0.27 to 1.02   | <0.001 | 0.96                                          | 0.78 to 1.13   | <0.001 |
| <b><i>Campylobacter</i> enteritis (CE)</b> |                                                     |                |        |                                               |                |        |
| no CE                                      | Reference                                           |                |        | Reference                                     |                |        |
| moderate CE                                | 1.02                                                | 0.90 to 1.13   | <0.001 | 0.28                                          | 0.23 to 0.34   | <0.001 |
| severe CE                                  | 0.87                                                | 0.72 to 1.03   | <0.001 | 0.26                                          | 0.19 to 0.34   | <0.001 |
| <b>Constant</b>                            | 0.91                                                | 0.79 to 1.03   | <0.001 | 4.18                                          | 4.11 to 4.25   | <0.001 |
| <b>Goodness-of-fit</b>                     |                                                     |                |        |                                               |                |        |
| McFadden's pseudo R <sup>2</sup>           | 0.10                                                |                |        |                                               |                |        |
| adjusted R <sup>2</sup>                    |                                                     |                |        | 0.06                                          |                |        |

Results of a two-part regression model: i) probability of non-zero costs via logistic regression, ii) cost estimation via ordinary least squares regression of log-transformed non-zero costs; n=4,036 patients and n=9,350 controls, matched by age, gender, state of residence and comorbidities (in terms of either the Elixhauser comorbidity index [3,4] or the pharmacy-based metric with the ATC algorithm [5], without *pain*). CE: *Campylobacter* enteritis, CI: confidence interval.

**Table G. Mean age- and gender-specific costs of *Campylobacter* enteritis per patient over a 12-month period [in € (95 % confidence intervals)].**

|                                               | Male                          |                               |                               |                               |                               |                               | Female                        |                               |                               |                               |                               |                               | Test for differences<br>[p value] |        |
|-----------------------------------------------|-------------------------------|-------------------------------|-------------------------------|-------------------------------|-------------------------------|-------------------------------|-------------------------------|-------------------------------|-------------------------------|-------------------------------|-------------------------------|-------------------------------|-----------------------------------|--------|
|                                               | <5 y                          | 5-14 y                        | 15-29 y                       | 30-44 y                       | 45-64 y                       | ≥65 y                         | <5 y                          | 5-14 y                        | 15-29 y                       | 30-44 y                       | 45-64 y                       | ≥65 y                         | Age group                         | Gender |
| <b>Moderate CE</b>                            |                               |                               |                               |                               |                               |                               |                               |                               |                               |                               |                               |                               |                                   |        |
| <b>Direct costs</b>                           | 168                           | 137<br>(137-138)              | 139<br>(139-140)              | 159                           | 187                           | 292                           | 215                           | 163                           | 167                           | 189                           | 221                           | 342                           | <0.001 <sup>a</sup>               | <0.001 |
| outpatient medical care                       | 149                           | 119                           | 121                           | 141                           | 161                           | 226                           | 195                           | 145                           | 147                           | 169                           | 192                           | 274                           | <0.001 <sup>b</sup>               | <0.001 |
| outpatient medical care provided in hospitals | 0                             | 0<br>(0-1)                    | 0<br>(0-1)                    | 0                             | 0                             | 0                             | 0                             | 0                             | 0                             | 0                             | 0                             | 0                             | 0.131                             | 0.145  |
| prescribed medication                         | 19                            | 17                            | 18                            | 18                            | 27                            | 65                            | 21                            | 18                            | 20                            | 20                            | 29                            | 69                            | <0.001 <sup>a</sup>               | <0.001 |
| <b>Indirect costs</b>                         | 0                             | 0                             | 381<br>(298-493)              | 546<br>(414-768)              | 559<br>(460-699)              | 11<br>(0-53)                  | 0                             | 0                             | 311<br>(242-409)              | 499<br>(385-727)              | 497<br>(415-599)              | 0                             | <0.001 <sup>c</sup>               | 0.329  |
| <b>Total</b>                                  | <b>168</b>                    | <b>137</b><br>(137-138)       | <b>521</b><br>(437-635)       | <b>703</b><br>(574-935)       | <b>746</b><br>(646-888)       | <b>303</b><br>(292-345)       | <b>215</b>                    | <b>163</b>                    | <b>478</b><br>(407-572)       | <b>687</b><br>(575-917)       | <b>717</b><br>(636-823)       | <b>342</b>                    | <0.001 <sup>d</sup>               | <0.001 |
| <b>Severe CE</b>                              |                               |                               |                               |                               |                               |                               |                               |                               |                               |                               |                               |                               |                                   |        |
| <b>Direct costs</b>                           | 2,172<br>(2,088-2,273)        | 2,046<br>(1,965-2,188)        | 2,129<br>(2,008-2,532)        | 2,223<br>(2,098-2,616)        | 2,406<br>(2,305-2,573)        | 2,733<br>(2,603-2,940)        | 2,134<br>(2,052-2,216)        | 2,079<br>(1,999-2,275)        | 2,030<br>(1,985-2,090)        | 2,080<br>(2,013-2,172)        | 2,364<br>(2,276-2,549)        | 2,664<br>(2,571-2,803)        | <0.001 <sup>e</sup>               | <0.001 |
| outpatient medical care                       | 71                            | 63                            | 64                            | 76                            | 87                            | 120                           | 90                            | 72                            | 73                            | 85                            | 97                            | 136                           | <0.001 <sup>d</sup>               | <0.001 |
| outpatient medical care provided in hospitals | 1<br>(0-3)                    | 0                             | 0                             | 0                             | 0                             | 0                             | 0                             | 0                             | 0<br>(0-1)                    | 0                             | 0                             | 0<br>(0-1)                    | 0.400                             | 0.543  |
| inpatient medical care                        | 2,082<br>(1,997-2,182)        | 1,967<br>(1,886-2,108)        | 2,049<br>(1,928-2,454)        | 2,131<br>(2,009-2,535)        | 2,295<br>(2,196-2,467)        | 2,553<br>(2,423-2,758)        | 2,025<br>(1,946-2,109)        | 1,990<br>(1,912-2,191)        | 1,939<br>(1,893-1,997)        | 1,977<br>(1,911-2,070)        | 2,240<br>(2,151-2,421)        | 2,465<br>(2,371-2,600)        | <0.001 <sup>f</sup>               | 0.766  |
| prescribed medication                         | 17                            | 16                            | 16                            | 16                            | 24                            | 59                            | 19                            | 17                            | 18                            | 18                            | 26                            | 63                            | <0.001 <sup>d</sup>               | <0.001 |
| <b>Indirect costs</b>                         | 0                             | 0                             | 577<br>(482-688)              | 1,129<br>(931-1,370)          | 1,106<br>(931-1,333)          | 3<br>(0-14)                   | 0                             | 0                             | 441<br>(368-520)              | 832<br>(648-1,140)            | 1,071<br>(820-1,544)          | 4<br>(0-13)                   | <0.001 <sup>g</sup>               | <0.001 |
| <b>Total</b>                                  | <b>2,172</b><br>(2,087-2,271) | <b>2,046</b><br>(1,965-2,188) | <b>2,706</b><br>(2,551-3,060) | <b>3,351</b><br>(3,105-3,720) | <b>3,512</b><br>(3,300-3,788) | <b>2,736</b><br>(2,606-2,943) | <b>2,134</b><br>(2,054-2,220) | <b>2,079</b><br>(2,001-2,284) | <b>2,471</b><br>(2,384-2,578) | <b>2,912</b><br>(2,717-3,207) | <b>3,434</b><br>(3,160-3,909) | <b>2,668</b><br>(2,572-2,813) | <0.001 <sup>h</sup>               | 0.682  |

Costs of outpatient medical care provided in hospitals and inpatient medical care associated with diagnoses of *Campylobacter* enteritis (CE); costs of outpatient medical care and medication estimated as additional costs in comparison to controls; indirect costs correspond to work incapacities monetized with the average labor costs. Costs are given as mean and 95 % confidence intervals (based on 10,000 bootstrap samples). Existing differences between age groups and gender were examined using the Wilcoxon rank-sum or Kruskal-Wallis test (followed by pairwise post-hoc Dunn's test).

<sup>a</sup> Pairwise comparisons using Dunn's test indicated statistically significant differences between all groups.

<sup>b</sup> Pairwise comparisons using Dunn's test indicated statistically significant differences between all groups except for <5 y and 45-64 y.

<sup>c</sup> Pairwise comparisons using Dunn's test indicated statistically significant differences between all groups except for <5 y and 5-14 y, <5 and ≥65 y, 5-14 y and ≥65 y, 15-29 y and 30-44y, 15-29 y and 45-64 y as well as 30-44 y and 45-64 y.

<sup>d</sup> Pairwise comparisons using Dunn's test indicated statistically significant differences between all groups except for <5 y and 30-44 y.

<sup>e</sup> Pairwise comparisons using Dunn's test indicated statistically significant differences between all groups except for 5-14 y and 15-29 y as well as 5-14 y and 30-44 y.

<sup>f</sup> Pairwise comparisons using Dunn's test indicated statistically significant differences between all groups except for <5 y and ≥65 y, 5-14 y and 15-29 y, 5-14 y and 30-44 y as well as 15-29 y and 30-44 y.

<sup>g</sup> Pairwise comparisons using Dunn's test indicated statistically significant differences between all groups except for <5 y and 5-14 y, <5 y and ≥65 y, 5-14 y and ≥65 y as well as 15-29 y and 45-64 y.

<sup>h</sup> Pairwise comparisons using Dunn's test indicated statistically significant differences between all groups except for <5 y and 15-29 y as well as 30-44 y and 45-64 y.

**Table H. Parameters and distribution functions used to extrapolate the costs of *Campylobacter* enteritis in Germany in 2017.**

| Model parameter                                                                                                                                                         | Distribution                                                           |
|-------------------------------------------------------------------------------------------------------------------------------------------------------------------------|------------------------------------------------------------------------|
| <b><i>Campylobacter</i> enteritis (CE)</b>                                                                                                                              |                                                                        |
| <b>Total number of CE cases</b>                                                                                                                                         |                                                                        |
| 69,476 reported cases, age- and gender-specific case numbers [2]                                                                                                        | no variation                                                           |
| <b>Number of severe CE cases</b>                                                                                                                                        |                                                                        |
| 13,159 hospitalized cases, age- and gender-specific case numbers [6]                                                                                                    | no variation                                                           |
| <b>CE mortality</b>                                                                                                                                                     |                                                                        |
| 8 deaths due to CE [7]; assumption: death occurs after severe CE [8,9]; full costs charged                                                                              | no variation                                                           |
| <b>Costs of CE per person over 12 months</b>                                                                                                                            |                                                                        |
| age- and gender-specific mean costs (Table G); reported CE cases with unknown age and/or gender were valued with the mean costs for moderate CE (Table 3)               | PERT(lower CI, mean, upper CI of cost estimate)                        |
| <b>Adjustment for multiple CE infections per patient over 12 months</b>                                                                                                 |                                                                        |
| - moderate CE: 1.11 diagnoses per patient over 12 months                                                                                                                | Uniform(1.00, 1.11)                                                    |
| - severe CE: 1.01 diagnoses per patient over 12 months                                                                                                                  | Uniform(1.00, 1.01)                                                    |
| <b>Sequelae</b>                                                                                                                                                         |                                                                        |
| <b>Probability of developing reactive arthritis (REA)</b>                                                                                                               |                                                                        |
| 0.12 % (Table 1);<br>sensitivity analysis: 1.7 % (95 % CI 0.5-5.8) [10]                                                                                                 | no variation<br>PERT(0.5, 1.7, 5.8)                                    |
| <b>Duration of REA</b>                                                                                                                                                  |                                                                        |
| 0.608 y [11]                                                                                                                                                            | Exponential(1/0.608)                                                   |
| <b>Probability of developing Guillain-Barré syndrome (GBS)</b>                                                                                                          |                                                                        |
| 0.06 % (Table 1), age- and gender-specific distribution of cases according to [12];<br>sensitivity analysis: 0.07 % (95 % CI 0.03-0.15) [13]                            | no variation<br>PERT(0.03, 0.07, 0.15)                                 |
| 17 % of GBS cases are mild [14]                                                                                                                                         | no variation                                                           |
| <b>Duration of GBS</b>                                                                                                                                                  |                                                                        |
| - mild GBS for patients <15 y: 0.181 y [15]                                                                                                                             | Exponential(1/0.181)                                                   |
| - severe GBS for patients <15 y: 0.553 y ( <i>C. jejuni</i> associated GBS cases [16])                                                                                  | Exponential(1/0.553)                                                   |
| - mild/severe GBS for patients ≥15 y: 0.530 y (average duration until healthy state is reached <sup>a</sup> [17])                                                       | Exponential(1/0.530)                                                   |
| - chronic GBS for patients ≥15 y: remaining age- and gender-specific life expectancy <sup>b</sup> [18]; 17-31 % of severe cases remain with permanent disability [9,14] | no variation;<br>Uniform(0.17, 0.31)                                   |
| <b>GBS mortality</b>                                                                                                                                                    |                                                                        |
| - age- and gender-specific mortality calculated as total deaths due to GBS [7] divided by total GBS cases estimated based on country-specific incidence rates [12,19]   | PERT(deaths divided by lower CI, mean, upper CI of GBS incidence rate) |
| - deaths occur 33 days (0.09 y) after onset of severe GBS [17]; partial costs charged                                                                                   | Exponential(1/0.09)                                                    |
| <b>Probability of developing Crohn's disease (CD)</b>                                                                                                                   |                                                                        |
| 1.44 % (Table 1);<br>sensitivity analysis: 0.05-0.17 % [13]                                                                                                             | no variation<br>Uniform(0.05, 0.17)                                    |
| <b>Duration of CD</b>                                                                                                                                                   |                                                                        |
| chronic [20]; remaining age- and gender-specific life expectancy <sup>b</sup> [18]                                                                                      | no variation                                                           |



**Table H. Parameters and distribution functions used to extrapolate the costs of *Campylobacter* enteritis in Germany in 2017 (continued).**

| Model parameter                                                                    | Distribution                                                                |
|------------------------------------------------------------------------------------|-----------------------------------------------------------------------------|
| <b>Probability of developing ulcerative colitis (UC)</b>                           |                                                                             |
| 1.86 % (Table 1);<br>sensitivity analysis: 0.07-0.45 % [13]                        | no variation<br>Uniform(0.07, 0.45)                                         |
| <b>Duration of UC</b>                                                              |                                                                             |
| chronic [21]; remaining age- and gender-specific life expectancy <sup>b</sup> [18] | no variation                                                                |
| <b>Probability of developing irritable bowel syndrome (IBS)</b>                    |                                                                             |
| 3.39 % (Table 1);<br>sensitivity analysis: 4.0 % (95 % CI 1.4-10.9) [13]           | no variation<br>PERT(1.4, 4.0, 10.9)                                        |
| <b>Duration of IBS</b>                                                             |                                                                             |
| 5 y [22–24]                                                                        | Exponential(1/5.0), maximal the remaining life expectancy <sup>b</sup> [18] |
| <b>Costs of REA / GBS / CD / UC / IBS per patient per 12 months</b>                |                                                                             |
| mean disease-related costs (Table 3)                                               | PERT(lower CI, mean, upper CI of cost estimate)                             |

CI: confidence interval, y: years.

<sup>a</sup> Reported proportions of healthy patients (F-score 0) were 0 % after 1 week, 1 % after 2 weeks, 5 % after 4 weeks, 28 % after 26 weeks, 35 % after 52 weeks [17]; a mean of 24 % are chronic cases [9,14]; therefore, the assumed disease duration of severe non-chronic cases was 1.5 weeks for 1 %, 3 weeks for 4 %, 15 weeks for 23 %, 39 weeks for 7 % and a maximum disease duration of 52 weeks for the remaining 41 %, resulting in an average disease duration of 27.6 weeks.

<sup>b</sup> The weighted age group-specific life expectancy was as follows [18]:

men: <5 y: 76.8 y, 5-14 y: 69.3 y, 15-29 y: 56.5 y, 30-44 y: 42.7 y, 45-64 y: 26.7 y, 65-74 y: 15.0 y, ≥75 y: 7.9 y;  
women: <5 y: 81.5 y, 5-14 y: 74.1 y, 15-29 y: 61.2 y, 30-44 y: 47.1 y, 45-64 y: 30.5 y, 65-74 y: 17.7 y, ≥75 y: 8.8 y.

**Table I. Extrapolation of cases and costs of *Campylobacter* enteritis in 2017 including sequelae in Germany.**

|                                                     | <b>Base case model</b><br><i>frequencies of sequelae as observed for AOK insureds</i> | <b>Sensitivity analysis</b><br><i>frequencies of sequelae according to published meta-analyses [13,10]</i> |
|-----------------------------------------------------|---------------------------------------------------------------------------------------|------------------------------------------------------------------------------------------------------------|
| <b>Cases</b>                                        |                                                                                       |                                                                                                            |
| <i>Campylobacter enteritis</i>                      | 69,476                                                                                |                                                                                                            |
| Moderate cases                                      | 56,317                                                                                |                                                                                                            |
| Severe cases                                        | 13,159                                                                                |                                                                                                            |
| <b>Sequelae [mean (95 % CI)]</b>                    |                                                                                       |                                                                                                            |
| Reactive arthritis                                  | 85                                                                                    | 1,193<br>(1,181-1,204)                                                                                     |
| Guillain-Barré syndrome                             | 43                                                                                    | 49<br>(48-49)                                                                                              |
| Crohn's disease                                     | 999                                                                                   | 75<br>(74-75)                                                                                              |
| Ulcerative colitis                                  | 1,291                                                                                 | 181<br>(179-182)                                                                                           |
| Irritable bowel syndrome                            | 2,353                                                                                 | 2,779<br>(2,758-2,801)                                                                                     |
| <b>Cost of illness [mean (95 % CI), in € 1,000]</b> |                                                                                       |                                                                                                            |
| <i>Campylobacter enteritis</i>                      |                                                                                       |                                                                                                            |
| Direct costs                                        | 41,279<br>(41,270-41,287)                                                             |                                                                                                            |
| Indirect costs                                      | 25,327<br>(25,308-25,347)                                                             |                                                                                                            |
| Total costs                                         | 66,606<br>(66,581-66,630)                                                             |                                                                                                            |
| <b>Sequelae</b>                                     |                                                                                       |                                                                                                            |
| Reactive arthritis                                  | 45<br>(44-46)                                                                         | 631<br>(615-647)                                                                                           |
| Guillain-Barré syndrome                             | 1,857<br>(1,843-1,870)                                                                | 2,207<br>(2,184-2,230)                                                                                     |
| Crohn's disease                                     | 11,337<br>(11,279-11,395)                                                             | 849<br>(842-856)                                                                                           |
| Ulcerative colitis                                  | 13,613<br>(13,566-13,660)                                                             | 1,909<br>(1,892-1,927)                                                                                     |
| Irritable bowel syndrome                            | 1,734<br>(1,708-1,760)                                                                | 2,049<br>(2,012-2,086)                                                                                     |
| Total costs                                         | 28,585<br>(28,500-28,669)                                                             | 7,646<br>(7,596-7,696)                                                                                     |
| <b>Total costs (discounted at 3 %)</b>              | <b>95,191</b><br><b>(95,103-95,279)</b>                                               | <b>74,252</b><br><b>(74,196-74,308)</b>                                                                    |
| Total costs (undiscounted)                          | 147,997<br>(147,767-148,227)                                                          | 82,717<br>(82,615-82,818)                                                                                  |
| Total costs (discounted at 5 %)                     | 83,102<br>(83,045-83,160)                                                             | 72,051<br>(72,006-72,097)                                                                                  |

Extrapolation is based on *Campylobacter* enteritis cases, hospitalizations and deaths as officially reported for Germany in 2017 [2,6,7]. Mean (95 % CI) number of cases and disease-related costs of *Campylobacter* enteritis and sequelae are presented (based on 10,000 iterations). CI: confidence interval.

## References

1. Bundesministerium für Gesundheit. Statistik über Versicherte, gegliedert nach Status, Alter, Wohnort und Kassenart (Stichtag: 1. Juli 2017). Mitgliederstatistik KM6 [cited 4 Aug 2021]. Available from: [https://www.bundesgesundheitsministerium.de/fileadmin/Dateien/3\\_Downloads/Statistiken/GKV/Mitglieder\\_Versicherte/KM6\\_2017.xlsx](https://www.bundesgesundheitsministerium.de/fileadmin/Dateien/3_Downloads/Statistiken/GKV/Mitglieder_Versicherte/KM6_2017.xlsx).
2. Robert Koch-Institut (RKI). SurvStat@RKI 2.0 [cited 4 May 2022]. Available from: <https://survstat.rki.de>.
3. Elixhauser A, Steiner C, Harris DR, Coffey RM. Comorbidity measures for use with administrative data. *Med Care*. 1998; 36:8–27. doi: 10.1097/00005650-199801000-00004.
4. Quan H, Sundararajan V, Halfon P, Fong A, Burnand B, Luthi J-C, et al. Coding algorithms for defining comorbidities in ICD-9-CM and ICD-10 administrative data. *Med Care*. 2005; 43:1130–9. doi: 10.1097/01.mlr.0000182534.19832.83.
5. Kuo RN, Dong Y-H, Liu J-P, Chang C-H, Shau W-Y, Lai M-S. Predicting healthcare utilization using a pharmacy-based metric with the WHO's Anatomic Therapeutic Chemical algorithm. *Med Care*. 2011; 49:1031–9. doi: 10.1097/MLR.0b013e31822e11.
6. Statistisches Bundesamt (Destatis). Tiefgegliederte Diagnosedaten der Krankenhauspatientinnen und -patienten 2017. 2018 [cited 4 Aug 2021]. Available from: [https://www.statistischebibliothek.de/mir/servlets/MCRFileNodeServlet/DEHeft\\_derivate\\_00056617/5231301177015.xlsx](https://www.statistischebibliothek.de/mir/servlets/MCRFileNodeServlet/DEHeft_derivate_00056617/5231301177015.xlsx).
7. Statistisches Bundesamt (Destatis). Gesundheit. Ergebnisse der Todesursachenstatistik für Deutschland 2017. 2019. Available from: [https://www.destatis.de/DE/Themen/Gesellschaft-Umwelt/Gesundheit/Todesursachen/Publikationen/Downloads-Todesursachen/todesursachenstatistik-5232101177015.xlsx?\\_\\_blob=publicationFile](https://www.destatis.de/DE/Themen/Gesellschaft-Umwelt/Gesundheit/Todesursachen/Publikationen/Downloads-Todesursachen/todesursachenstatistik-5232101177015.xlsx?__blob=publicationFile).
8. Lackner J, Weiss M, Müller-Graf C, Greiner M. The disease burden associated with *Campylobacter* spp. in Germany, 2014. *PLoS One*. 2019; 14:e0216867. doi: 10.1371/journal.pone.0216867.
9. European Centre for Disease Prevention and Control (ECDC). ECDC BCoDE toolkit [software application]. Version 2.0.0. 2020 [cited 9 Nov 2020]. Available from: <https://www.ecdc.europa.eu/en/publications-data/toolkit-application-calculate-dalys>.
10. Pogreba-Brown K, Austhof E, Tang X, Trejo MJ, Owusu-Dommey A, Boyd K, et al. Enteric Pathogens and Reactive Arthritis: Systematic Review and Meta-Analyses of Pathogen-Associated Reactive Arthritis. *Foodborne Pathog Dis*. 2021; 18:627–39. doi: 10.1089/fpd.2020.2910.
11. Mangen M, Havelaar AH, Wit GA de. *Campylobacteriosis and sequelae in the Netherlands. Estimating the disease burden and the cost-of illness*. National Institute for Public Health and the Environment (RIVM); 2004. Available from: <https://www.rivm.nl/bibliotheek/rapporten/250911004.pdf>.
12. Hense S, Schink T, Kreisel SH, Marcelon L, Simondon F, Tahden M, et al. Estimation of background incidence rates of Guillain-Barré syndrome in Germany - a retrospective cohort study with electronic healthcare data. *Neuroepidemiology*. 2014; 43:244–52. doi: 10.1159/000369344.
13. Keithlin J, Sargeant J, Thomas MK, Fazil A. Systematic review and meta-analysis of the proportion of *Campylobacter* cases that develop chronic sequelae. *BMC Public Health*. 2014; 14:1203. doi: 10.1186/1471-2458-14-1203.
14. Havelaar AH, Wit MA de, van Koningsveld R, van Kempen E. Health burden in the Netherlands due to infection with thermophilic *Campylobacter* spp. *Epidemiol Infect*. 2000; 125:505–22. doi: 10.1017/s0950268800004933.
15. Korinthenberg R, Mönting JS. Natural history and treatment effects in Guillain-Barré syndrome: a multicentre study. *Archives of Disease in Childhood*. 1996; 74:281–7. doi: 10.1136/adc.74.4.281.
16. Schessl J, Luther B, Kirschner J, Mauff G, Korinthenberg R. Infections and vaccinations preceding childhood Guillain-Barré syndrome: a prospective study. *Eur J Pediatr*. 2006; 165:605–12. doi: 10.1007/s00431-006-0140-1.
17. Doets AY, Verboon C, van den Berg B, Harbo T, Cornblath DR, Willison HJ, et al. Regional variation of Guillain-Barré syndrome. *Brain*. 2018; 141:2866–77. doi: 10.1093/brain/awy232.
18. Statistisches Bundesamt (Destatis). Sterbetafeln 2016/2018. Ergebnisse aus der laufenden Berechnung von Periodensterbetafeln für Deutschland und die Bundesländer. 2019.
19. Statistisches Bundesamt (Destatis). Bevölkerung: Bundesländer, Stichtag, Geschlecht, Altersjahre. Tabelle 12411-0013 [cited 8 Dec 2021]. Available from: <https://www-genesis.destatis.de/genesis/online?operation=statistic&levelindex=0&levelid=1584541234414&code=12411>.
20. Sturm A, Atreya R, Bettenworth D, Bokemeyer B, Dignaß A, Ehehalt R, et al. Aktualisierte S3-Leitlinie "Diagnostik und Therapie des Morbus Crohn". Deutsche Gesellschaft für Gastroenterologie, Verdauungs- und Stoffwechselkrankheiten (DGVS), editor. 2021. Available from: [https://www.awmf.org/uploads/tx\\_szleitlinien/021-004l\\_S3\\_Morbus\\_Crohn\\_Diagnostik\\_Therapie\\_2021-08.pdf](https://www.awmf.org/uploads/tx_szleitlinien/021-004l_S3_Morbus_Crohn_Diagnostik_Therapie_2021-08.pdf).
21. Kucharzik T, Dignass AU, Atreya R, Bokemeyer B, Esters P, Herrlinger K, et al. Aktualisierte S3-Leitlinie Colitis ulcerosa – Living Guideline. *Z Gastroenterol*. 2020; 58:e241-e326. doi: 10.1055/a-1296-3444.

22. Youn YH, Kim HC, Lim HC, Park JJ, Kim J-H, Park H. Long-term Clinical Course of Post-infectious Irritable Bowel Syndrome After Shigellosis: A 10-year Follow-up Study. *J Neurogastroenterol Motil.* 2016; 22:490–6. doi: 10.5056/jnm15157.
23. Marshall JK, Thabane M, Garg AX, Clark WF, Moayyedi P, Collins SM. Eight year prognosis of postinfectious irritable bowel syndrome following waterborne bacterial dysentery. *Gut.* 2010; 59:605–11. doi: 10.1136/gut.2009.202234.
24. Neal KR, Barker L, Spiller RC. Prognosis in post-infective irritable bowel syndrome: a six year follow up study. *Gut.* 2002; 51:410–3. doi: 10.1136/gut.51.3.410.
